# Supplementary material for: Adverse Birth Outcomes Due to Exposure to Household Air Pollution from Unclean Cooking Fuel among Women of Reproductive Age in Nigeria
Source: PubMed Central journal article supplement (PMC7828613; doi:10.3390/ijerph18020634), 2021-01-13
Supplement: ijerph-18-00634-s001.pdf [file ijerph-18-00634-s001.pdf]

Supplementary

Table S1. Bivariate analysis of adverse birth outcomes and HAP exposure, mother's level, and household characteristics.

| Characteristics         | Birth Status             |                     |             | Birth Weight      |                      |             | Pregnancy Duration    |                    |             |
|-------------------------|--------------------------|---------------------|-------------|-------------------|----------------------|-------------|-----------------------|--------------------|-------------|
|                         | Stillbirth, <i>n</i> (%) | Alive, <i>n</i> (%) | PR (95% CI) | LBW, <i>n</i> (%) | Normal, <i>n</i> (%) | PR (95% CI) | Preterm, <i>n</i> (%) | Term, <i>n</i> (%) | PR (95% CI) |
| Mother's Age, mean ± SD | 37.0 ± 7.9               | 35.7 ± 7.93         | <0.0001     | 29.9 ± 6.3        | 30.6 ± 6.1           | 0.012       | 30.8 ± 6.9            | 29.9 ± 6.9         | 0.011       |
| Smoking Status          |                          |                     |             |                   |                      |             |                       |                    |             |
| Non-Smoker              | 18,187 (99.8)            | 109107 (99.8)       | 0.671       | 559 (99.5)        | 7147 (99.7)          | 0.212       | 408 (100)             | 39,246 (99.8)      | 1           |
| Smoker                  | 33 (0.2)                 | 218 (0.2)           |             | 3 (0.5)           | 19 (0.3)             |             | 0 (0)                 | 84 (0.2)           |             |
| Cooking Fuel            |                          |                     |             |                   |                      |             |                       |                    |             |
| Clean                   | 503 (2.8)                | 7626 (7)            | <0.0001     | 113 (23.4)        | 1633 (23.3)          | 0.125       | 59 (14.6)             | 2856 (7.4)         | <0.0001     |
| Unclean                 | 17,598 (97.2)            | 100,669 (93)        |             | 442 (76.6)        | 5373 (76.7)          |             | 345 (85.4)            | 35,972 (92.6)      |             |
| Wealth Quintile         |                          |                     |             |                   |                      |             |                       |                    |             |
| Poorest                 | 6072 (33.3)              | 25,076 (22.9)       | <0.0001     | 27 (3.8)          | 226 (3.2)            | 0.107       | 73 (17.9)             | 9403 (23.9)        | <0.0001     |
| Poorer                  | 5206 (28.6)              | 24,242 (22.2)       |             | 46 (620.2)        | 574 (620.8)          |             | 69 (16.9)             | 9003 (22.9)        |             |
| Middle                  | 3545 (19.5)              | 23,575 (21.6)       |             | 115 (19.5)        | 1367 (19.1)          |             | 84 (20.6)             | 8337 (21.2)        |             |
| Richer                  | 2252 (12.4)              | 20,958 (19.2)       |             | 171 (29.4)        | 2097 (29.3)          |             | 90 (22.1)             | 7130 (18.1)        |             |
| Richest                 | 1145 (6.3)               | 15,474 (14.2)       |             | 203 (40.1)        | 2902 (40.5)          |             | 92 (22.5)             | 5457 (13.9)        |             |
| Education               |                          |                     |             |                   |                      |             |                       |                    |             |
| No education            | 11,806 (64.8)            | 51,893 (47.5)       | <0.0001     | 87 (8.5)          | 560 (8.8)            | < 0.0001    | 135 (33.1)            | 18,071 (45.9)      | <0.0001     |
| Primary                 | 3318 (18.2)              | 21,993 (20.1)       |             | 83 (12.8)         | 898 (12.5)           |             | 59 (14.5)             | 6180 (15.7)        |             |
| Secondary               | 2599 (14.3)              | 28,157 (25.8)       |             | 269 (54.9)        | 3920 (54.7)          |             | 145 (35.5)            | 12,116 (30.8)      |             |
| Higher                  | 497 (2.7)                | 7282 (6.7)          |             | 123 (24.9)        | 1788 (24.25)         |             | 69 (16.9)             | 2963 (7.5)         |             |
| Region                  |                          |                     |             |                   |                      |             |                       |                    |             |
| North Central           | 2413 (13.2)              | 19,243 (17.6)       | <0.0001     | 124 (22.1)        | 1480 (20.7)          | < 0.0001    | 78 (19.1)             | 6773 (17.2)        | <0.0001     |
| North East              | 4114 (22.6)              | 22,179 (20.3)       |             | 49 (8.7)          | 605 (7.1)            |             | 86 (21.1)             | 8268 (21.0)        |             |
| North West              | 8510 (46.7)              | 31,418 (28.7)       |             | 109 (19.4)        | 528 (7.4)            |             | 69 (16.9)             | 12,102 (30.8)      |             |
| South East              | 1166 (5.6)               | 12,906 (11.6)       |             | 85 (15.1)         | 1900 (26.5)          |             | 49 (12.0)             | 4455 (11.3)        |             |
| South South             | 1011 (5.5)               | 11,425 (10.5)       |             | 63 (11.2)         | 1091 (15.2)          |             | 36 (8.8)              | 3687 (9.4)         |             |
| South West              | 1006 (5.5)               | 12,154 (11.1)       |             | 132 (23.5)        | 1662 (23.2)          |             | 90 (22.1)             | 4045 (10.3)        |             |

**Table S2.** Criterion for model selection.

| <b>Model</b> | <b>Description</b>                               | <b>Model Diagnostic</b> | <b>Birth Status</b> | <b>Birth Weight</b> | <b>Pregnancy Duration</b> |
|--------------|--------------------------------------------------|-------------------------|---------------------|---------------------|---------------------------|
| Model 1      | Includes types of cooking fuel+spatial component | Deviance ( $\bar{D}$ )  | 99,681.89           | 3710.40             | 4300.44                   |
|              |                                                  | ( $pD$ )                | 36.62               | 31.75               | 28.54                     |
|              |                                                  | DIC                     | 99,755.14           | 3773.90             | 4357.53                   |
| Model 2      | Model 1 + random effect                          | Deviance ( $\bar{D}$ )  | 81,626.45           | 1562.13             | 1123.85                   |
|              |                                                  | ( $pD$ )                | 7045.53             | 859.53              | 673.25                    |
|              |                                                  | DIC                     | 95,717.51           | 3281.19             | 2470.36                   |
| Model 3      | Model 2 + nonlinear effect of age                | Deviance ( $\bar{D}$ )  | 81,898.82           | 1495.81             | 1129.00                   |
|              |                                                  | ( $pD$ )                | 6792.76             | 873.25              | 676.42                    |
|              |                                                  | DIC                     | 95,484.45           | 3242.32             | 2481.84                   |
| Model 4      | Model 3 + education and geopolitical regions     | Deviance ( $\bar{D}$ )  | 81,931.41           | 1423.36             | 1147.37                   |
|              |                                                  | ( $pD$ )                | 6686.12             | 885.32              | 680.50                    |
|              |                                                  | DIC                     | 95,303.67           | 3194.00             | 2508.36                   |
